# Supplementary material for: Virtual reality for management of pain in hospitalized patients: A randomized comparative effectiveness trial
Source: PLOS journal article supplement (doi:10.1371/journal.pone.0219115), 2019-08-14
Supplement: S1 (10.1371/journal.pone.0219115.s001) [file journal.pone.0219115.s001]

| Title             | Content Description                                                                                   | Screenshot                                                                            |
|-------------------|-------------------------------------------------------------------------------------------------------|---------------------------------------------------------------------------------------|
| Guided Relaxation | Look around a scenic mountain and ocean environment while being guided through meditations.           |    |
| Bear Blast        | Take a journey through animated worlds to blast as many bears and targets as possible.                |    |
| Crossing Worlds   | A visual tone poem showcasing a transcendent spectrum of austere landscapes from the American desert. |    |
| Feeding Frenzy    | Launch different types of food to hungry animals before time runs out.                                |   |
| Wright Flyer      | This VR experience allows the viewer to fly a 1905 Wright Flyer over Huffman Prairie                  |  |

| Title           | Content Description                                                                                | Screenshot                                                                            |
|-----------------|----------------------------------------------------------------------------------------------------|---------------------------------------------------------------------------------------|
| Germ Buster     | Germs have taken over every room of your beloved home. Fight back with your hydrolaser bubble gun. | 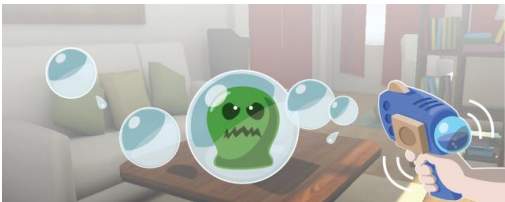   |
| Farm Sanctuary  | Transport to the rolling hills and green pastures of Farm Sanctuary's Watkins Glen animal shelter. |    |
| Shape Your Path | Match colored bricks while avoiding obstacles to reach a destination.                              |    |
| Dream Beach     | Relax with beautiful ocean views while listening to the sounds of nature.                          |   |
| Wild West       | Mingle with a group of wild animals in some of the last wild spaces in the West.                   |  |

| Title               | Content Description                                                                                               | Screenshot                                                                            |
|---------------------|-------------------------------------------------------------------------------------------------------------------|---------------------------------------------------------------------------------------|
| The Body VR         | Enter the body and learn how the organelles work together to fight deadly viruses.                                | 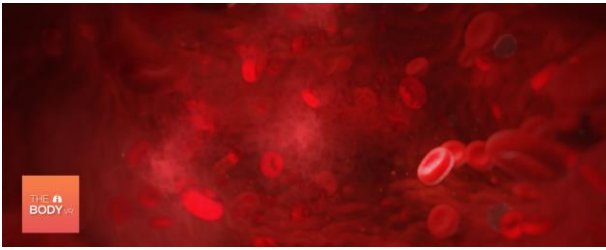   |
| Seals Healing       | Dive into a hospital for seals who are released back into the wild when healed, but not before giving you a kiss. |    |
| Dolphins Healing    | Swim underwater with wild dolphins in their natural, serene home.                                                 |    |
| The Art of the Dunk | Put yourself right on the court with the best dunkers in the world.                                               |   |
| The Redwoods        | Take a tour and stand beneath the majestic California Coast Redwoods                                              |  |

| Title                      | Content Description                                                              | Screenshot                                                                            |
|----------------------------|----------------------------------------------------------------------------------|---------------------------------------------------------------------------------------|
| Machu Pichu                | A guided journey to the mysterious Machu Pichu                                   |    |
| Home Turf: The Needles     | Retreat to the Needles with Alex Honnold, one of the world's best rock climbers. |    |
| Home Turf: Moab            | Walk a tightrope across a canyon in Moab, Utah with slackliner Andy Lewis.       |    |
| Iceland                    | Fly over and take in views of Iceland with an exciting helicopter tour.          |   |
| Do Not Push the Red Button | The world's first animated 360-degree Rube Goldberg Machine.                     |  |
