# Supplementary material for: Virtual reality for management of pain in hospitalized patients: A randomized comparative effectiveness trial
Source: PLOS journal article supplement (doi:10.1371/journal.pone.0219115), 2019-08-14

S2 Fig presents results by day of an audio-visual usage survey question (“How much of your time today was spent watching TV/Virtual Reality?”).

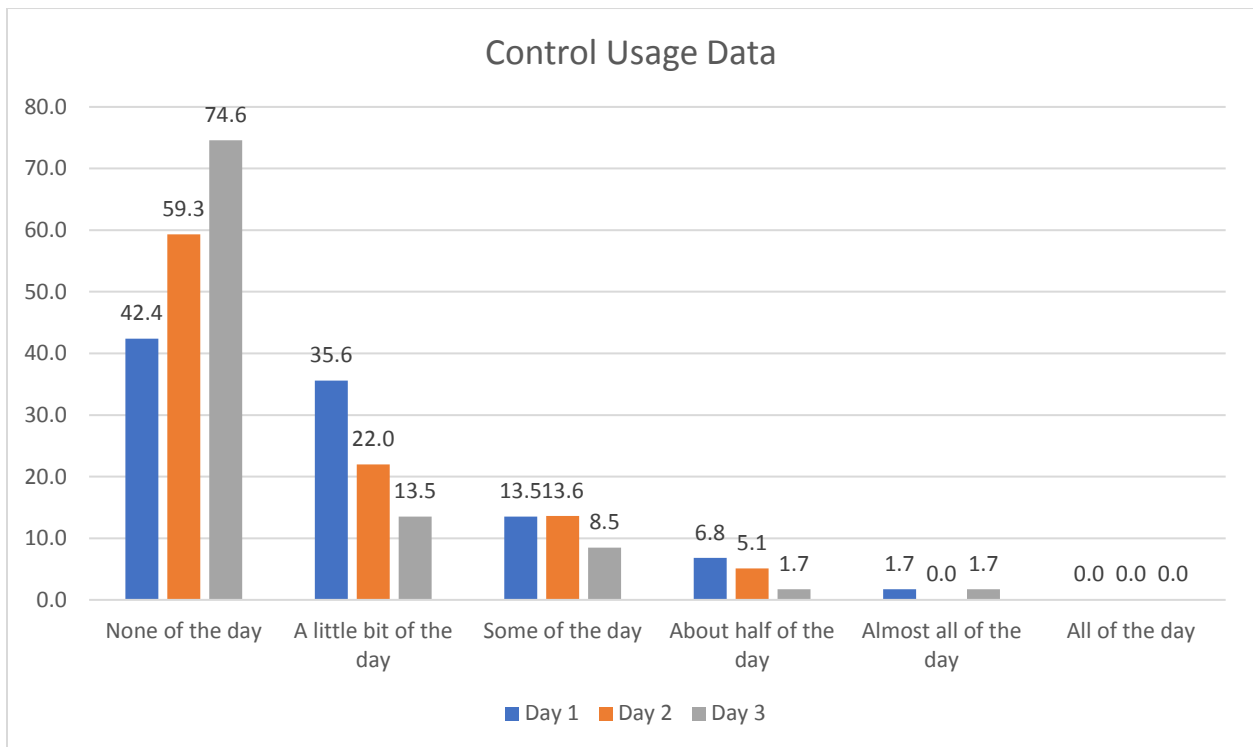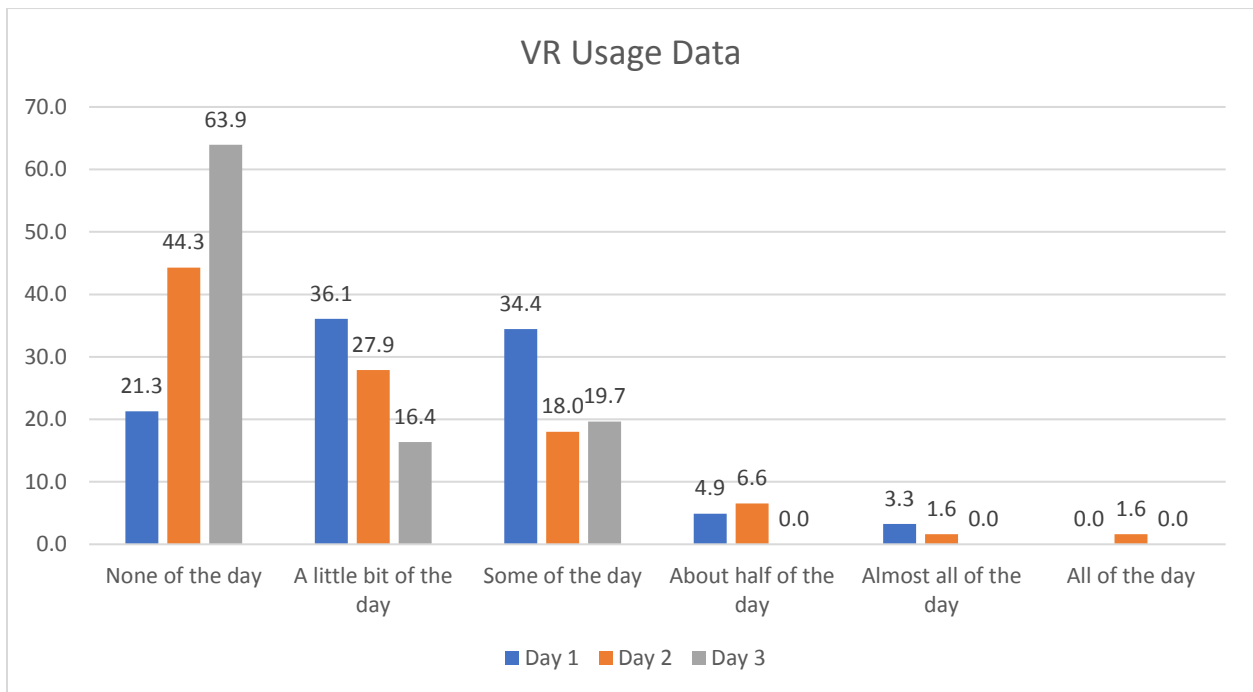

Supplement: S2 (10.1371/journal.pone.0219115.s002) [file journal.pone.0219115.s002]
